# Supplementary material
Source: Royal Society of Chemistry journal article supplement (doi:10.1039/d6fo00739b)
Supplement: d6fo00739b1.pdf [file d6fo00739b1.pdf]

Table S1 Composition of experimental diets

| Ingredient (g/kg)                     | NCD    | HFD    | Intervention group diet |        | UB:<br>untreated<br>high<br>and<br>barle<br>y<br>bran;<br>FB:<br>ferm<br>ente<br>d<br>high<br>and<br>barle<br>y<br>bran;<br>NC<br>D:<br>nor<br>mal<br>contr<br>ol<br>diet;<br>HFD:<br>high |
|---------------------------------------|--------|--------|-------------------------|--------|--------------------------------------------------------------------------------------------------------------------------------------------------------------------------------------------|
|                                       |        |        | HFD-UB                  | HFD-FB |                                                                                                                                                                                            |
| UB                                    | 0.00   | 0.00   | 150.00                  | 0.00   |                                                                                                                                                                                            |
| FB                                    | 0.00   | 0.00   | 0.00                    | 150.00 |                                                                                                                                                                                            |
| Casein                                | 189.56 | 258.45 | 227.65                  | 224.10 |                                                                                                                                                                                            |
| L-Cystine                             | 2.84   | 3.88   | 3.88                    | 3.88   |                                                                                                                                                                                            |
| Corn Starch                           | 479.79 | 0.00   | 0.00                    | 0.00   |                                                                                                                                                                                            |
| Maltodextrin 10                       | 118.48 | 161.53 | 114.91                  | 111.31 |                                                                                                                                                                                            |
| Sucrose                               | 65.21  | 88.91  | 88.91                   | 88.91  |                                                                                                                                                                                            |
| Cellulose, BW200                      | 47.39  | 64.61  | 0.00                    | 7.08   |                                                                                                                                                                                            |
| Soybean Oil                           | 23.70  | 32.31  | 24.28                   | 24.41  |                                                                                                                                                                                            |
| Lard                                  | 18.96  | 316.60 | 316.60                  | 316.60 |                                                                                                                                                                                            |
| Mineral Mix                           | 9.48   | 12.92  | 12.92                   | 12.92  |                                                                                                                                                                                            |
| DiCalcium Phosphate                   | 12.32  | 16.80  | 16.80                   | 16.80  |                                                                                                                                                                                            |
| Calcium Carbonate                     | 5.21   | 7.11   | 7.11                    | 7.11   |                                                                                                                                                                                            |
| Potassium Citrate, 1 H <sub>2</sub> O | 15.64  | 21.32  | 21.32                   | 21.32  |                                                                                                                                                                                            |
| Vitamin Mix, V10001                   | 9.48   | 12.92  | 12.92                   | 12.92  |                                                                                                                                                                                            |
| Choline Bitartrate                    | 1.90   | 2.58   | 2.58                    | 2.58   |                                                                                                                                                                                            |
| FD&C Yellow Dye #5                    | 0.04   | 0.00   | 0.00                    | 0.00   |                                                                                                                                                                                            |
| FD&C Blue Dye #1                      | 0.01   | 0.07   | 0.07                    | 0.07   |                                                                                                                                                                                            |
| Total                                 | 1000   | 1000   | 1000                    | 1000   |                                                                                                                                                                                            |
| Energy and their source (%)           |        |        |                         |        |                                                                                                                                                                                            |
| Protein                               | 20     | 20     | 20                      | 20     |                                                                                                                                                                                            |
| Carbohydrate                          | 70     | 20     | 20                      | 20     |                                                                                                                                                                                            |
| Fat                                   | 10     | 60     | 60                      | 60     |                                                                                                                                                                                            |
| Total                                 | 100    | 100    | 100                     | 100    |                                                                                                                                                                                            |

-fat diet; HFD-UB: high-fat diet supplemented with 15% UB; HFD-FB: high-fat diet supplemented with 15% FB. To equalize carbohydrate, protein, fat, sucrose and fiber content (g/kg diet) among the HFD, HFD-UB, and HFD-FB diets, casein, maltodextrin, soybean oil, and cellulose were reduced in the HFD-UB and HFD-FB diet, respectively. The proximate nutritional composition of UB was as follows (g/100 g dry weight basis): total dietary fiber 48.87, starch 23.52, protein 15.34, fat 5.36, ash 4.02; The proximate nutritional composition of FB was as follows (g/100 g dry weight basis): total dietary fiber 38.36, starch 18.29, protein 16.58, fat 5.27, ash 4.83.

Table S2 Primers sequences

| Gene             | Forward sequence (5'-3') | Reverse sequence (5'-3') |
|------------------|--------------------------|--------------------------|
| GAPDH            | GTTTCCTCGTCCCGTAG        | AATCTCCACTTTGCCACT       |
| PPAR $\alpha$    | GTCATCACAGACACCCTC       | GGGTTGTTGCTGGTCT         |
| PPAR $\gamma$    | GATTTCTCCAGCATTTC        | ATCGCACTTTGGTATT         |
| AMPK $\alpha$ -1 | CATAAAGTGGCTGTGAA        | GTGAGGGTGCCTGAAC         |
| CPT-1            | TGTCCAAGTATCTGGCAGTC     | AGCCGTCATCAGCAACC        |
| SREBP1c          | AGGCACAGATGTGTCTATGG     | TCACCTGGTTATCCTCAAAGG    |
| ACC              | GGCAGCAGTTACACCACATAC    | TCATTACCTCAATCTCAGCATAGC |
| LKB1             | AACCTGCTACTCACCACC       | ATGTCCACCTTGAAACCT       |
| SREBP2           | CTACCGCAAGGTGTTCC        | TTGGTGTTCTGAGTGGG        |
| HMGR             | GTCTGGACGAAGATGTG        | GGCTAAACTCAGGGTAAT       |
| Cd36             | AGTCCTGGCTGTGTTTGGAG     | CTGTACACAGTGGTGCCTGT     |
| FAS              | GCCTCTGGTGCTTGCT         | TTCACGAACCCGCCTC         |

Fig. S1

A

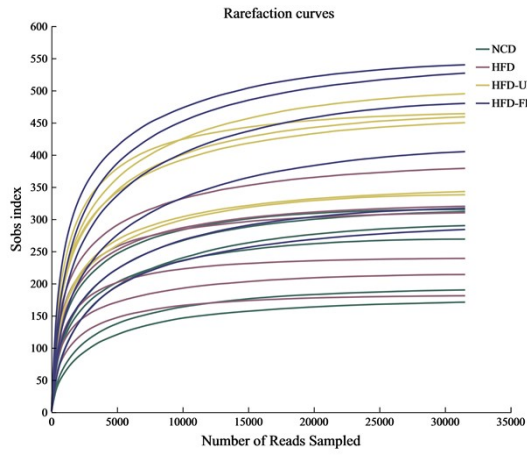

B

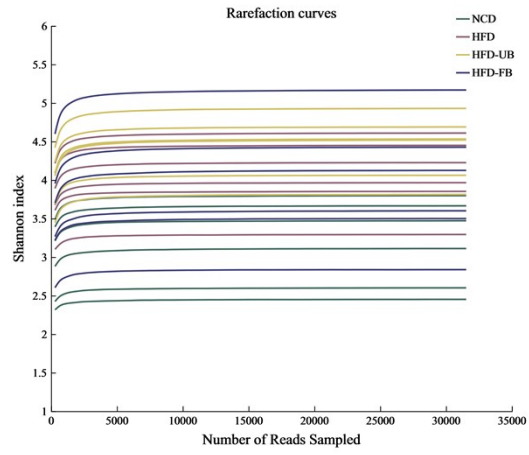

Fig. S2

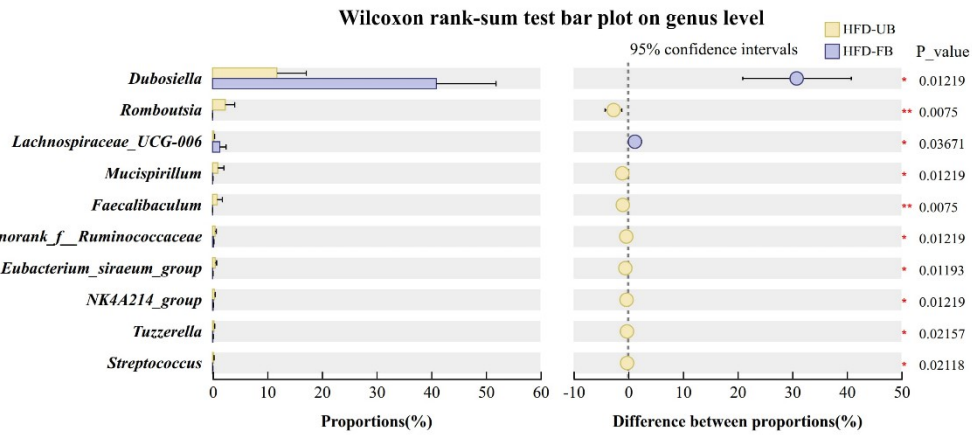

Fig. S3

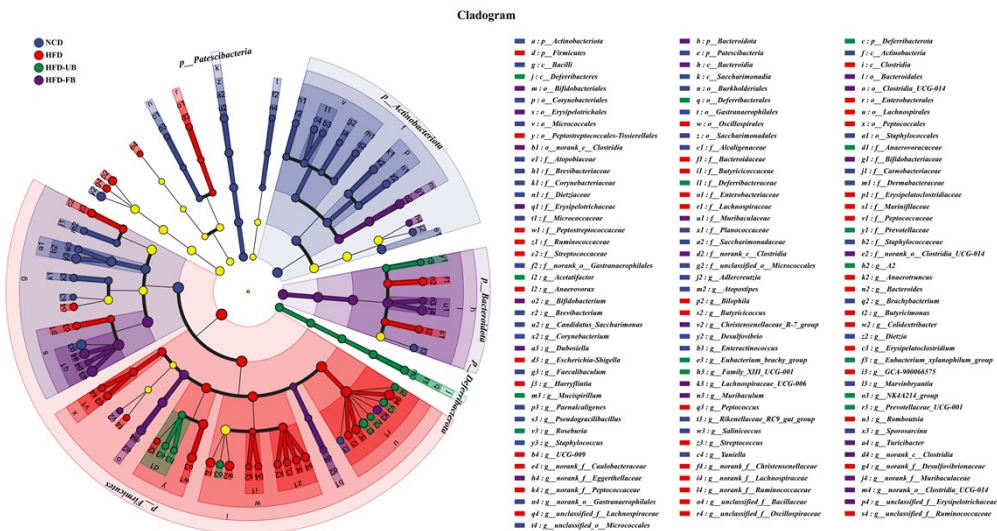

## Method S1

Total polyphenol content was determined as follows: 125  $\mu\text{L}$  of the extract was mixed with 500  $\mu\text{L}$  of distilled water. Subsequently, 125  $\mu\text{L}$  of Folin-Ciocalteu reagent was added, and the mixture was allowed to stand for 6 min. Then, 1.25 mL of a 7% (w/v)  $\text{Na}_2\text{CO}_3$  solution and 1.0 mL of deionized water were added. After thorough mixing, the mixture was incubated in the dark for 90 min. Absorbance was measured at 760 nm. The results were expressed as milligrams of gallic acid equivalent per gram of dry weight (mg GAE/g DW).

Total flavonoid content was determined as follows: 0.5 mL of the extract was mixed with 2.25 mL of distilled water, followed by the addition of 0.15 mL of a 5% (w/v)  $\text{NaNO}_2$  solution. After 6 min of reaction, 0.3 mL of 10% (w/v)  $\text{AlCl}_3$  was added and the mixture was allowed to stand for 5 min. Subsequently, 1 mL of NaOH solution (1 mol/L) was added and mixed thoroughly. The absorbance was measured immediately at 510 nm. The results were expressed as milligrams of rutin equivalent per gram of dry weight (mg RE/g DW).

The phenolic acids and flavonoids were quantified using liquid chromatography-mass spectrometry (AB 6600LC-MS, Milwaukee, WI, USA). Reversed-phase high-performance liquid chromatography separation was carried out using a Waters HSS T3 column (50 $\times$ 2.1 mm, 1.8  $\mu\text{m}$ ). The mobile phase components were mobile phase A (water with 0.1% formic acid) and mobile phase B (acetonitrile with 0.1% formic acid). The mobile phase gradient was: 0-2 min, 10% B; 2-9 min, 60% B; 9-12 min, 10% B. The injection volume was 2  $\mu\text{L}$  and the column temperature was 40  $^\circ\text{C}$ . The mass

spectrometer was operated in negative ion mode with the following parameters: Sheath gas, 40 arb; auxiliary gas, 10 arb; ion spray voltage, -2800 V; temperature, 350 °C, ion transfer tube temperature: 320 °C. For quantitative determination, the standard curve was made by known concentrations of standard compounds.
